# Supplementary material for: Novel oxazine and oxazone dyes: aggregation behavior and physicochemical properties
Source: Royal Society of Chemistry journal article supplement (doi:10.1039/c6nj02053d), 2016-01-01
Supplement: c6nj02053d1.pdf [file c6nj02053d1.pdf]

**Electronic Supplementary Information (ESI) for New Journal of Chemistry**

Novel Oxazine and Oxazone Dyes: Aggregation Behavior and Physicochemical Properties

María N. Urrutia and Cristina S. Ortiz\*

*\*Departamento de Farmacia, Facultad de Ciencias Químicas, Universidad Nacional de Córdoba, Córdoba, X5000HUA, Argentina. \*Email: [crisar@fcq.unc.edu.ar](mailto:crisar@fcq.unc.edu.ar); Tel: +54-351-5353865*

# **ELECTRONIC SUPPLEMENTARY INFORMATION (ESI)**

## **Table of Contents**

|                                      |           |
|--------------------------------------|-----------|
| <b>Aggregation studies data.....</b> | <b>S3</b> |
|--------------------------------------|-----------|

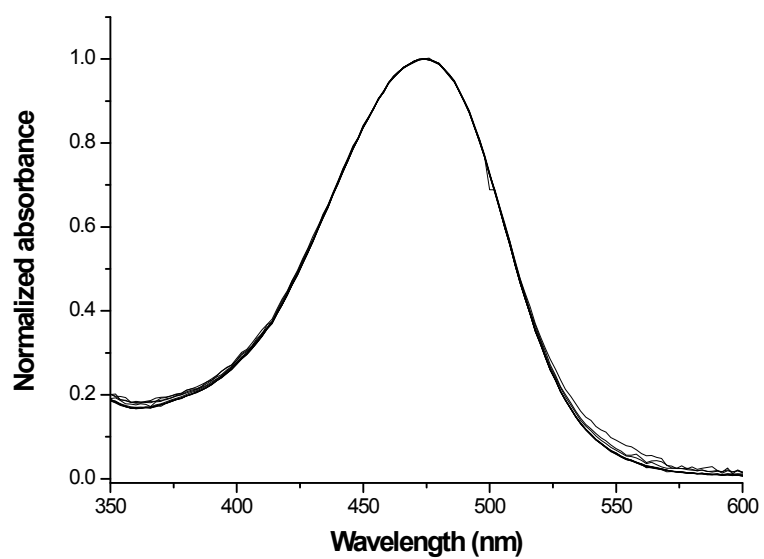

Figure S1: Normalized absorption spectra at 474 nm of CVBr<sub>3</sub> in DMF as a function of concentration, n=11. [CVBr<sub>3</sub>]= 1.79x10<sup>-6</sup> M - 3.23x10<sup>-5</sup> M.

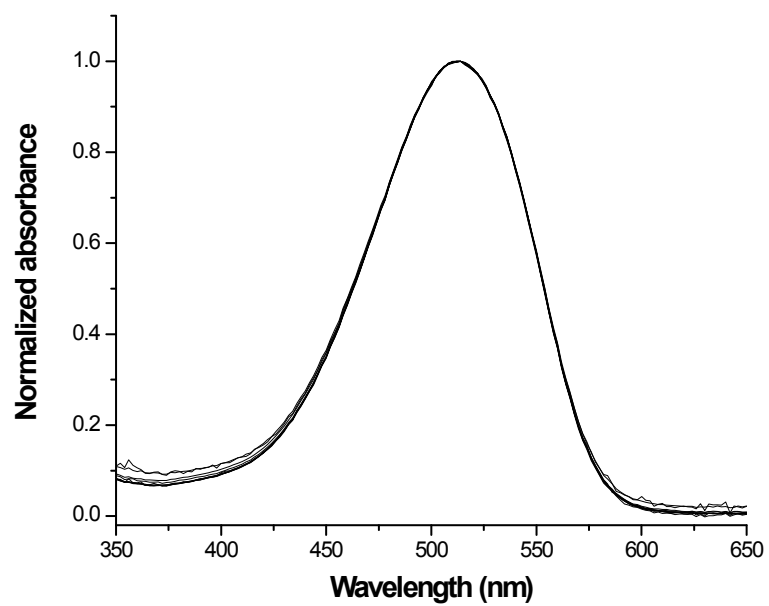

Figure S2: Normalized absorption spectra at 514 nm of CR in DMF as a function of concentration,  $n=10$ .  $[CR]= 1.53 \times 10^{-5} \text{ M} - 2.13 \times 10^{-4} \text{ M}$ .

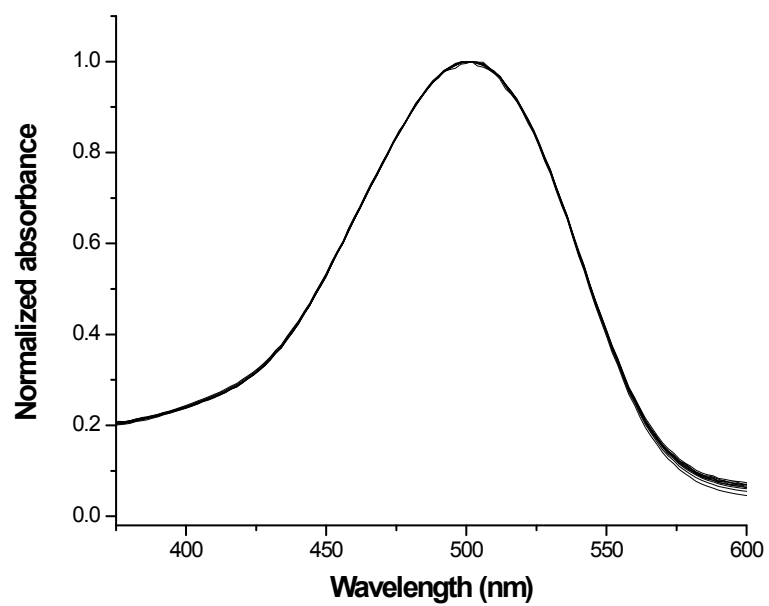

Figure S3: Normalized absorption spectra at 502 nm of CRBr<sub>3</sub> in DMF as a function of concentration, n=10. [CRBr<sub>3</sub>]= 8.07x10<sup>-5</sup> M – 8.02x10<sup>-4</sup> M.

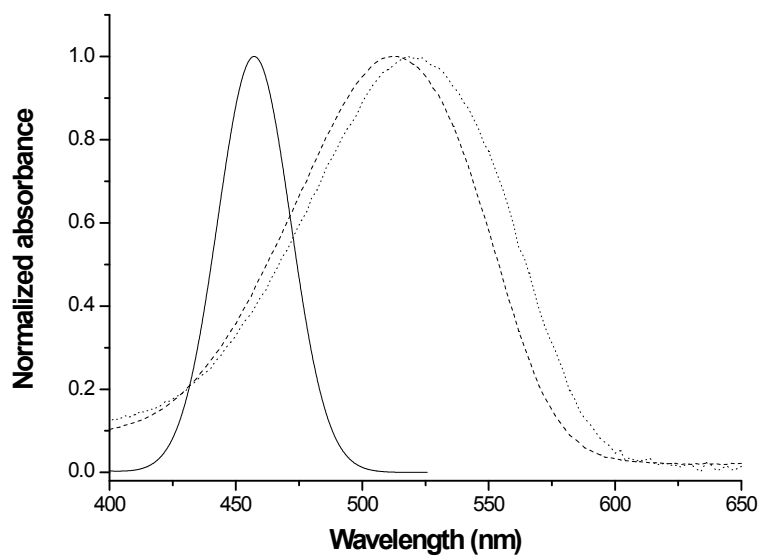

Figure S4: Theoretical and experimental visible absorption band for CR. Solid-line: Theoretical spectrum of monomer in DMF ( $\lambda_{ES}= 457.2$  nm); dashed-line: Experimental spectrum of aggregate in DMF ( $\lambda_{Exp}= 512$  nm); dotted-line: Experimental spectrum of aggregate in ethanol ( $\lambda_{Exp}= 520$  nm).

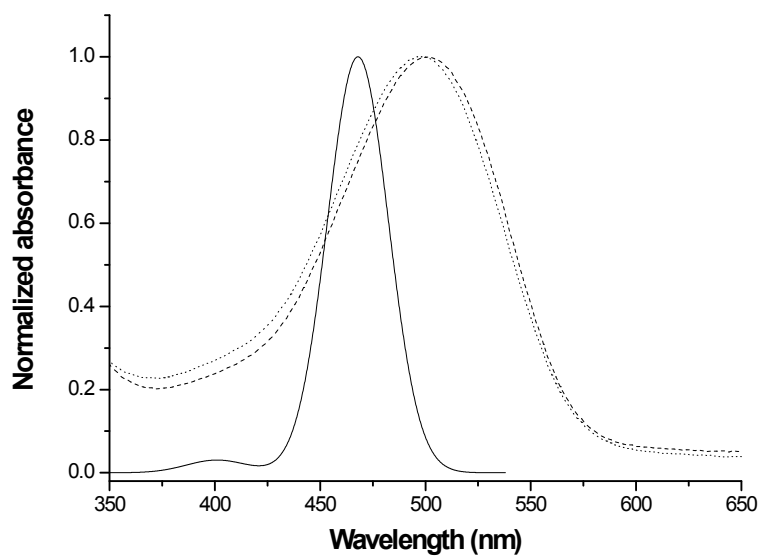

Figure S5: Theoretical and experimental visible absorption band for CRBr<sub>3</sub>. Solid-line: Theoretical spectrum of monomer in DMF ( $\lambda_{ES}$ = 468.0 nm). Solid-line: Experimental spectrum of aggregate in DMF ( $\lambda_{Exp}$ = 498 nm); dashed-line: Experimental spectrum of aggregate in ethanol ( $\lambda_{Exp}$ = 498 nm).
